# Supplementary material for: Exploring the association between BMI and mortality in Australian women and men with and without diabetes: the AusDiab study
Source: Springer Nature journal article supplement (doi:10.1007/s00125-019-4830-4), 2019-02-26
Supplement: MOESM1 [file 16509262]

## Electronic supplementary material

### ESM Methods

#### **ESM study participants**

The Australian Diabetes, Obesity and Lifestyle (AusDiab) study is a population based longitudinal study, with a nationwide representative sample of adults 25 years and older. This study had three phases, with a baseline survey conducted in 1999-2000 using a nationwide cluster sampling method, from 42 randomly selected districts involving six states and the Northern Territory. The data collection method consisted of a household questionnaire, interviews and a biomedical examination. Of 20,347 eligible participants, 11,247 participants (55.3%) completed the household questionnaire and attended the biomedical examination and formed the sample for the baseline study. Participants of the baseline study were invited for second and third waves of the survey undertaken in 2004-2005 and 2011-2012, respectively. Further details of the AusDiab study design and methods have been published elsewhere [1, 2]. The data used in the present study were retrieved from the AusDiab baseline survey.

#### **ESM variables**

BMI category at baseline was the primary exposure variable for this study. Height was measured to the nearest 0.5 cm using a stadiometer and weight was measured to the nearest 0.5 kg using a mechanical beam balance scale. BMI was calculated as weight in kilograms divided by square of height in meters ( $BMI=kg/m^2$ ). Diabetes was defined by the WHO classification of diabetes mellitus [3], based on the 75 gm 2-hour oral glucose tolerance test (Table 1), venous plasma glucose levels (fasting plasma glucose level  $\geq 7.0$  or 2-hour glucose level  $\geq 11.1$  mmol/l). Additionally, participants currently treated with insulin or oral hypoglycaemic agents were classified as having diabetes. The primary outcome of this study

was all-cause mortality which was identified by linking the AusDiab data to the Australian National Death Index (NDI). The accuracy of the NDI in identifying the vital status of the Australian population has been reported previously [4]. Demographic and other variables included age, sex, marital status, education level, weekly income, smoking and physical activity status. Information about demographic characteristics was collected through interviewer led household and general questionnaires. Age was categorized into: 25-34, 35-44, 45-54, 55-59, 60-64, 65-69, 70-74, 75-79, 80-84, and  $\geq 85$  year age groups. Smoking status was assessed based on self-reported responses obtained from the general questionnaire at baseline and categorized as current smoker, ex-smoker or never smoker. Self-reported physical activity classification was based on proposed national standards for the measurement of physical activity (PA) developed by the Australian Institute of Health and Welfare (AIHW) and categorized as sedentary (0 min PA time/week), insufficient (1 -149min PA time/week) or sufficient (over 149 min PA time/week)[5]. The level of educational attainment was categorized as never attended school/primary school, some high school, completed high school, or university/TAFE. Marital status was categorized as married/de facto; separated/divorced/widowed; or never married. Weekly income was categorized as  $\geq \$1500$ , \$800-1499, \$400-799, or \$0-399.

### **ESM statistical analysis**

Individuals still alive at the end of follow-up were censored and tied survival times were broken using Breslow's method. All variables were treated as categorical. Interaction terms between BMI and each of age, smoking status, and physical activity were examined, none were significant at  $p < 0.05$  and hence these interactions were not included in the final model. The proportional hazards (PH) assumption was tested by examining the relationship between the scaled Schoenfeld residuals and survival time and the overall fit of the models was assessed by examining the Cox-Snell residuals. Complete case analysis was used initially, and

analyses were then repeated using multiple imputation of missing values. No substantial differences were noted and HR and 95% CI using complete case analysis are presented.

Missing values and multiple imputation:

As noted in the flow diagram of study population derivation (ESM Figure 1), participants with missing values for BMI, diabetes status, smoking status and date of death were excluded from the study, leaving 10,575 participants (with complete values for these variables) available for analysis. Of these, 10,394 participants had no missing values and were included in complete case analysis, while 181 had missing values for weekly income (n=156), physical activity (n=22), marital status (n=4) or educational attainment (n=3), some participants had missing values for more than one variable. Multinomial logistic regression on the remaining predictor variables, the Nelson-Aalen estimator of the cumulative hazard function and the event indicator was used to impute missing values [6]. Final models were fitted separately on each of 30 imputed datasets and results were combined according to the combination rules by Rubin [7].

## ESM Tables

**ESM Table 1. WHO classification for diagnostic criteria of diabetes and intermediate hyperglycaemia based on plasma glucose levels**

| Status                           | Fasting plasma glucose level (mmol/l) | And/or | 2-hour plasma glucose level (mmol/l) |
|----------------------------------|---------------------------------------|--------|--------------------------------------|
| Normal glucose tolerance (NG)    | <6.1                                  | and    | <7.8                                 |
| Impaired fasting glucose (IFG)   | 6.1-6.9                               | and    | <7.8                                 |
| Impaired glucose tolerance (IGT) | <7.0                                  | and    | 7.8-11.0                             |
| Diabetes                         | ≥7.0                                  | or     | ≥11.1                                |

Mmol/l: Millimoles per litre

Cited and modified from [3]

## Descriptive tables

ESM Table 2. Baseline characteristics of participants of the AusDiab cohort by BMI category and diabetes status

|                                                           | Participants without diabetes |              |              |              | Participants with diabetes <sup>a</sup> |              |              |              |
|-----------------------------------------------------------|-------------------------------|--------------|--------------|--------------|-----------------------------------------|--------------|--------------|--------------|
|                                                           | Normal weight                 | Overweight   | Obese        | All          | Normal weight                           | Overweight   | Obese        | All          |
| <b>n (male %)</b>                                         | 3736 (36.2)                   | 3994 (55.5)  | 1985 (41.2)  | 9715 (45.1)  | 150 (50.0)                              | 317 (59.0)   | 393(49.4)    | 860 (53.0)   |
| <b>Age, years: mean (SD)</b>                              | 48.7(14.4)                    | 52.4 (14.1)  | 51.1 (12.8)  | 50.7 (14.0)  | 68.5 (12.5)                             | 64.0 (11.5)  | 60.6 (11.8)  | 63.2 (12.2)  |
| <b>Marital status %</b>                                   |                               |              |              |              |                                         |              |              |              |
| Married/De facto                                          | 75.8                          | 78.9         | 77.3         | 77.4         | 60.0                                    | 69.0         | 69.5         | 67.6         |
| Separated/Divorced/Widowed                                | 14.0                          | 14.1         | 15.7         | 14.4         | 34.7                                    | 26.9         | 21.9         | 26.0         |
| Never married                                             | 10.3                          | 7.0          | 7.1          | 8.3          | 5.3                                     | 4.1          | 8.7          | 6.4          |
| <b>Education attainment %</b>                             |                               |              |              |              |                                         |              |              |              |
| Never attended school/Primary                             | 4.5                           | 6.3          | 6.9          | 5.7          | 18.7                                    | 17.4         | 16.5         | 17.2         |
| Some high school                                          | 33.5                          | 36.8         | 45.5         | 37.3         | 43.3                                    | 41.8         | 45.6         | 43.8         |
| Completed high school                                     | 20.4                          | 19.0         | 17.3         | 19.2         | 15.3                                    | 14.2         | 15.3         | 14.9         |
| University/ TAFE                                          | 41.6                          | 37.9         | 30.3         | 37.8         | 22.7                                    | 26.6         | 22.7         | 24.1         |
| <b>Weekly income %</b>                                    |                               |              |              |              |                                         |              |              |              |
| \$ 1500+                                                  | 17.5                          | 18.2         | 15.3         | 17.3         | 7.7                                     | 6.8          | 7.8          | 7.4          |
| \$ 800-1499                                               | 29.6                          | 28.6         | 27.6         | 28.8         | 10.5                                    | 15.4         | 17.7         | 15.6         |
| \$400-799                                                 | 29.7                          | 28.0         | 30.4         | 29.1         | 31.5                                    | 32.8         | 27.8         | 30.3         |
| \$0-399                                                   | 23.2                          | 25.3         | 26.8         | 24.8         | 50.4                                    | 45.0         | 46.8         | 46.7         |
| <b>BMI kg/m<sup>2</sup>: mean (SD)</b>                    | 22.6 (1.6)                    | 27.2 (1.4)   | 33.9 (3.8)   | 26.8 (4.7)   | 22.9 (1.6)                              | 27.6 (1.4)   | 35.2(4.8)    | 30.3 (5.9)   |
| <b>Waist circumference, cm, mean (SD)</b>                 |                               |              |              |              |                                         |              |              |              |
| <b>Men</b>                                                | 86.9 (6.4)                    | 97.6 (6.4)   | 111.4 (8.9)  | 96.9 (10.9)  | 89.7 (5.7)                              | 101.2 (6.4)  | 116.3 (9.9)  | 105.7 (12.7) |
| <b>Women</b>                                              | 75.2 (6.5)                    | 86.8 (6.8)   | 101.5 (10.0) | 84.8 (12.6)  | 80.1 (7.2)                              | 92.1 (6.7)   | 108.5 (11.5) | 97.9 (14.6)  |
| <b>Physical activity in past week (PA) % <sup>b</sup></b> |                               |              |              |              |                                         |              |              |              |
| Sedentary (0 min PA )                                     | 14.1                          | 16.0         | 21.9         | 16.5         | 15.3                                    | 23.1         | 30.3         | 25.0         |
| Insufficient (b/w 0 and 149 min PA)                       | 31.2                          | 28.6         | 32.8         | 30.5         | 40.0                                    | 30.4         | 29.5         | 31.7         |
| Sufficient (>149 min PA)                                  | 54.7                          | 55.4         | 45.3         | 53.1         | 44.7                                    | 46.5         | 40.2         | 43.3         |
| <b>Smoking %</b>                                          |                               |              |              |              |                                         |              |              |              |
| Current-smoker                                            | 17.3                          | 14.8         | 15.1         | 15.8         | 12.7                                    | 13.6         | 12.0         | 12.7         |
| Ex-smoker                                                 | 24.4                          | 31.0         | 30.7         | 28.4         | 38.0                                    | 37.2         | 39.2         | 38.3         |
| Non-smoker                                                | 58.3                          | 54.2         | 54.2         | 55.8         | 49.3                                    | 49.2         | 48.9         | 49.1         |
| <b>Systolic BP, mmHg: mean (SD)</b>                       | 123.2 (17.8)                  | 130.8 (17.8) | 133.4 (16.8) | 128.4 (18.1) | 142.7 (22.8)                            | 144.3 (19.7) | 145.2 (18.6) | 144.4 (19.8) |
| <b>Hypertension %<sup>c</sup></b>                         | 19.1                          | 33.5         | 41.8         | 29.7         | 60.7                                    | 73.7         | 72.1         | 70.7         |

<sup>a</sup> Based on World Health Organization criteria [3], <sup>b</sup> based on Australian Institute of Health and Welfare criteria[5], <sup>c</sup> based on  $\geq 140/90$  mmHg and/or taking blood pressure-lowering medication

**ESM Table 3. Age at baseline of the 10, 575 participants of the AusDiab study, by BMI category and diabetes status**

| Diabetes status  | BMI category  | <i>n</i> | Mean | SD   | Range    |
|------------------|---------------|----------|------|------|----------|
| Without diabetes | Normal weight | 3736     | 48.7 | 14.4 | (25, 89) |
|                  | Overweight    | 3994     | 52.4 | 14.1 | (25, 91) |
|                  | Obese         | 1985     | 51.1 | 12.8 | (25, 90) |
| With diabetes    | Normal weight | 150      | 68.5 | 12.5 | (29, 89) |
|                  | Overweight    | 317      | 64.1 | 11.5 | (35, 91) |
|                  | Obese         | 393      | 60.6 | 11.8 | (25, 87) |

**ESM Table 4. Sample size (*n*) and number of events (deaths) by BMI category and diabetes status for 10,394 participants of the AusDiab study examined in the multivariable model**

|                  |                | BMI Category  |          |            |          |        |          |        |          |
|------------------|----------------|---------------|----------|------------|----------|--------|----------|--------|----------|
|                  |                | Normal weight |          | Overweight |          | Obese  |          | Total  |          |
|                  |                | Events        | <i>n</i> | Events     | <i>n</i> | Events | <i>n</i> | Events | <i>n</i> |
| <b>Total</b>     | <b>Persons</b> | 443           | 3820     | 645        | 4242     | 350    | 2332     | 1438   | 10394    |
|                  | Men            | 218           | 1412     | 396        | 2380     | 155    | 998      | 769    | 4790     |
|                  | Women          | 225           | 2408     | 249        | 1862     | 195    | 1334     | 669    | 5604     |
| Without diabetes | Persons        | 370           | 3677     | 537        | 3933     | 224    | 1947     | 1131   | 9557     |
|                  | Men            | 180           | 1340     | 328        | 2198     | 90     | 807      | 598    | 4345     |
|                  | Women          | 190           | 2337     | 209        | 1735     | 134    | 1140     | 533    | 5212     |
| With diabetes    | Persons        | 73            | 143      | 108        | 309      | 126    | 385      | 307    | 837      |
|                  | Men            | 38            | 72       | 68         | 182      | 65     | 191      | 171    | 445      |
|                  | Women          | 35            | 71       | 40         | 127      | 61     | 194      | 136    | 392      |

### Mortality relative to 'normal weight without diabetes'

**ESM Table 5. Hazard ratios and 95% confidence intervals for all-cause mortality by weight status and diabetes status relative to normal weight without diabetes**

| Weight and diabetes status     | HR   | 95% CI      | <i>p</i> -value |
|--------------------------------|------|-------------|-----------------|
| Normal weight without diabetes | 1.00 | (Reference) |                 |
| Overweight without diabetes    | 0.98 | 0.87,1.11   | 0.80            |
| Obese without diabetes         | 1.12 | 0.98,1.29   | 0.10            |
| Normal weight with diabetes    | 1.43 | 1.09,1.89   | 0.01            |
| Overweight with diabetes       | 1.31 | 1.05,1.63   | 0.02            |
| Obese with diabetes            | 1.50 | 1.20,1.87   | <0.001          |

Adjusted for sex, educational attainment, weekly income, smoking status, physical activity, cluster, and strata of age group and marital status.

The *p*-value for the interaction term between BMI and diabetes status is 0.92

## Sensitivity Analyses

**ESM Table 6. Hazard ratios and 95% confidence intervals for all-cause mortality by BMI category for all participants and participants with diabetes considering diabetes status, BMI category, smoking status and physical activity as time-varying covariates**

| Population    | Time varying covariates    | BMI Category: HR (95% CI) |                  |                  | p-value |
|---------------|----------------------------|---------------------------|------------------|------------------|---------|
|               |                            | Normal weight             | Overweight       | Obese            |         |
| Total         | Diabetes                   | 1.00                      | 0.99 (0.87,1.12) | 1.15 (0.99,1.33) | 0.02    |
|               | Diabetes, BMI              | 1.00                      | 0.94 (0.83,1.06) | 1.03 (0.89,1.19) | 0.19    |
|               | Diabetes, smoking, PA      | 1.00                      | 0.97 (0.86,1.10) | 1.11 (0.96,1.29) | 0.02    |
|               | Diabetes, smoking, BMI, PA | 1.00                      | 0.95(0.84,1.07)  | 1.03 (0.89,1.19) | 0.19    |
| With diabetes | Diabetes                   | 1.00                      | 0.91 (0.67,1.22) | 1.00 (0.74,1.35) | 0.48    |
|               | Diabetes, BMI              | 1.00                      | 0.82(0.61,1.10)  | 0.86 (0.64,1.16) | 0.65    |
|               | Diabetes, smoking, PA      | 1.00                      | 0.86 (0.64,1.16) | 0.90 (0.67,1.23) | 0.48    |
|               | Diabetes, BMI, smoking, PA | 1.00                      | 0.83 (0.62,1.11) | 0.85 (0.63,1.14) | 0.65    |

Adjusted for sex, educational attainment, weekly income, smoking status, physical activity, strata of age group and marital status.

**ESM Table 7. Hazard ratios and 95% confidence intervals for all-cause mortality in participants with diabetes excluding deaths in the first 3 and then 5 years.**

| Population    | Excluding         | Deaths/n | BMI Category: HR (95% CI) |                  |                  | p-value |
|---------------|-------------------|----------|---------------------------|------------------|------------------|---------|
|               |                   |          | Normal                    | Overweight       | Obese            |         |
| With diabetes |                   | 307/837  | 1.00                      | 0.86 (0.60,1.21) | 0.91 (0.62,1.33) | 0.65    |
|               | First 3yrs deaths | 252/782  | 1.00                      | 0.89 (0.58,1.37) | 0.87 (0.59,1.29) | 0.80    |
|               | First 5yrs deaths | 216/746  | 1.00                      | 0.77 (0.48,1.23) | 0.85 (0.57,1.28) | 0.54    |

Adjusted for sex, educational attainment, weekly income, smoking status, physical activity, cluster, and strata of age group and marital status.

**ESM Table8. Hazard ratios and 95% confidence intervals for all-cause mortality by BMI category and diabetes status while restricting analysis to never smokers**

| Population       | Deaths/n | BMI Category: HR (95% CI) |                  |                  | p-value |
|------------------|----------|---------------------------|------------------|------------------|---------|
|                  |          | Normal weight             | Overweight       | Obese            |         |
| Total            | 698/5742 | 1.00                      | 0.97 (0.81,1.16) | 1.17 (0.96,1.42) | 0.07    |
| Without diabetes | 563/5332 | 1.00                      | 0.98 (0.80,1.20) | 1.13 (0.87,1.46) | 0.40    |
| With diabetes    | 135/410  | 1.00                      | 0.79 (0.45,1.39) | 0.91 (0.53,1.56) | 0.64    |

Adjusted for sex, educational attainment, weekly income, smoking status, physical activity, cluster, and strata of age group and marital status.

**ESM Table 9. Hazard ratio and 95% confidence intervals for all-cause mortality by BMI category and diabetes status after reclassifying individuals with impaired fasting glucose and impaired glucose tolerance as having diabetes**

|                  | Deaths/ <i>n</i> | BMI Category: HR (95% CI) |                  |                  | <i>p</i> -value |
|------------------|------------------|---------------------------|------------------|------------------|-----------------|
|                  |                  | Normal weight             | Overweight       | Obese            |                 |
| Total            | 1438/10394       | 1.00                      | 0.97 (0.87,1.09) | 1.18 (1.05,1.32) | 0.001           |
| Without diabetes | 728/7663         | 1.00                      | 1.03 (0.87,1.20) | 1.23 (1.00,1.51) | 0.11            |
| With diabetes    | 710/2731         | 1.00                      | 0.88 (0.72,1.06) | 0.97 (0.79,1.19) | 0.27            |

Adjusted for sex, educational attainment, weekly income, smoking status, physical activity, cluster, and strata of age group and marital status.

**ESM Table10. Hazard ratio and 95% confidence intervals for all-cause mortality by BMI category and diabetes status after excluding individuals with impaired fasting glucose and impaired glucose tolerance**

| Population       | Deaths/ <i>n</i> | BMI Category: HR (95% CI) |                  |                  | <i>p</i> -value |
|------------------|------------------|---------------------------|------------------|------------------|-----------------|
|                  |                  | Normal weight             | Overweight       | Obese            |                 |
| Total            | 1035/8500        | 1.00                      | 0.99 (0.87,1.12) | 1.26 (1.07,1.47) | 0.002           |
| Without diabetes | 728/7663         | 1.00                      | 1.03 (0.87,1.20) | 1.23 (1.00,1.51) | 0.11            |
| With diabetes    | 307/837          | 1.00                      | 0.86 (0.60,1.21) | 0.91 (0.62,1.33) | 0.65            |

Adjusted for sex, educational attainment, weekly income, smoking status, physical activity, cluster, and strata of age group and marital status.



## ESM Figures

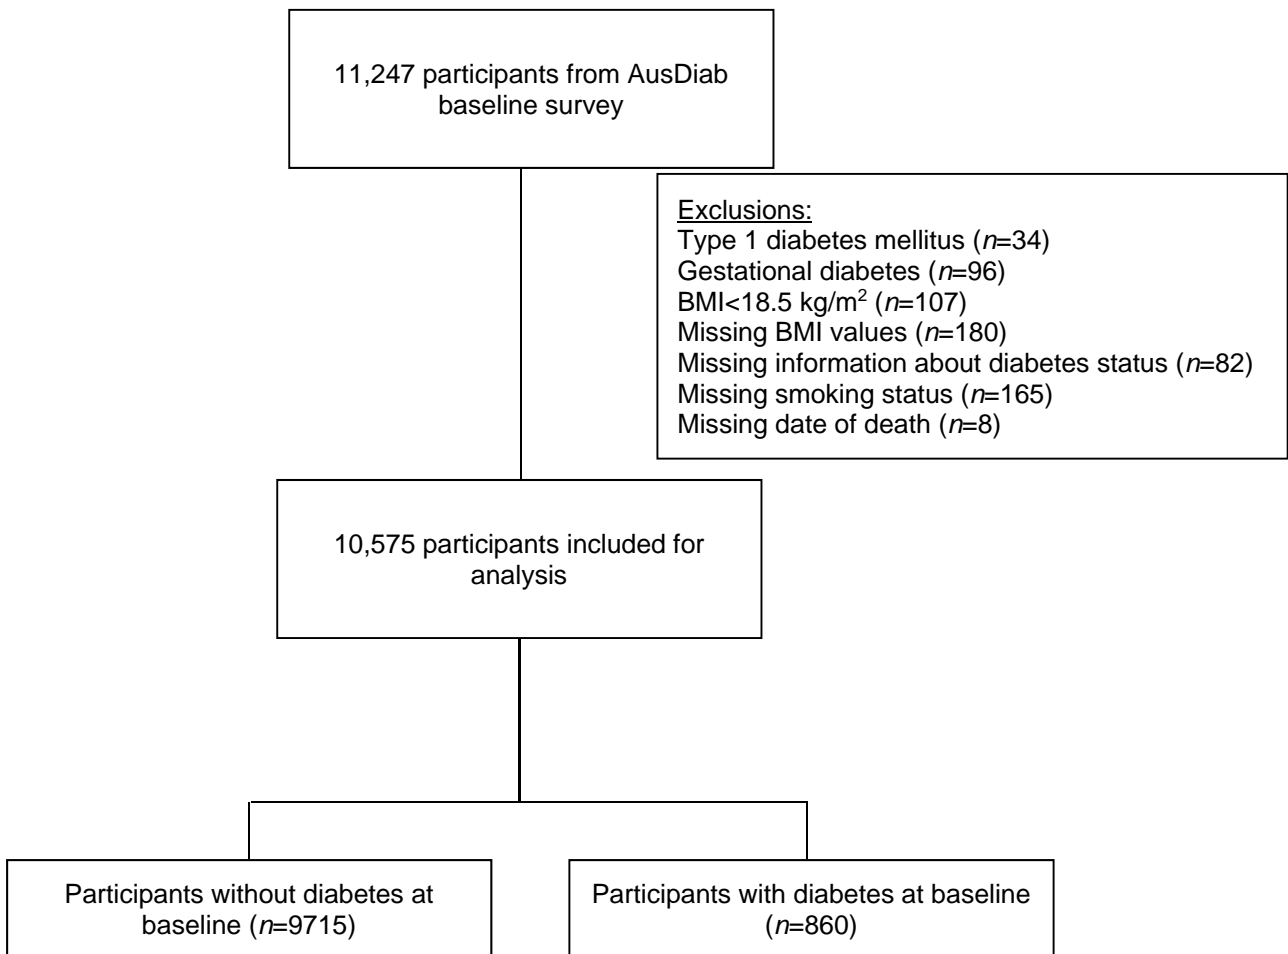

**ESM Figure 1: Flow diagram of study population derivation**

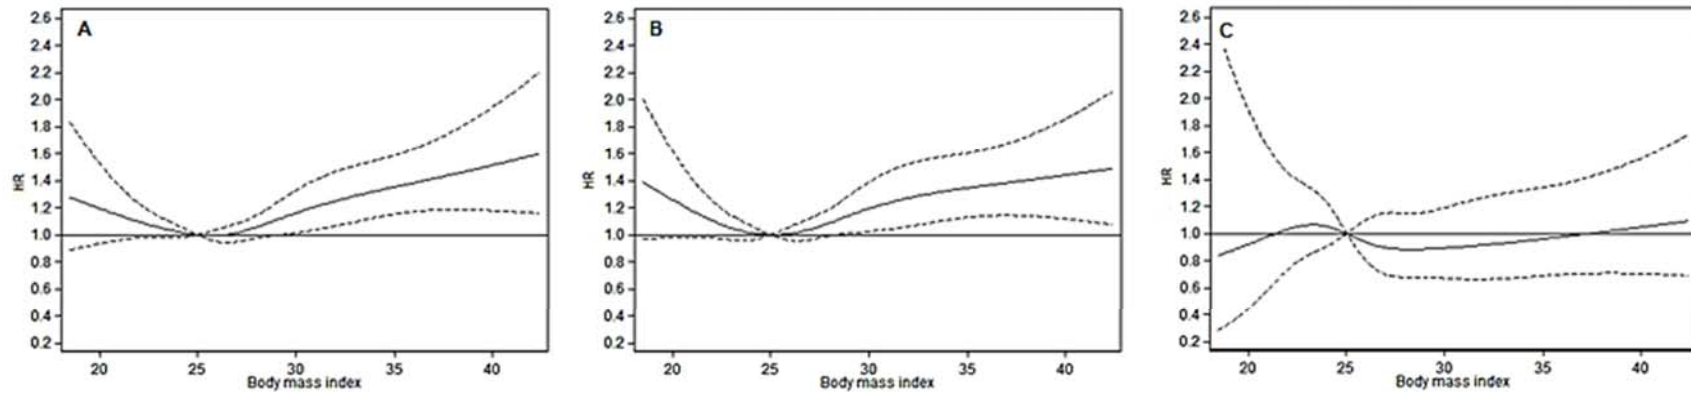

ESM Figure 2: Plots displaying the association between BMI and mortality by fitting restricted cubic spline model for (A) entire cohort; (B) individuals without diabetes; and (C) individuals with diabetes. Non-linear relationship between BMI and mortality is displayed with solid black line. Dashed lines represent 95% CI

## References:

- [1] Dunstan DW, Zimmet PZ, Welborn TA, et al. (2002) The Australian Diabetes, Obesity and Lifestyle Study (AusDiab)--methods and response rates. *Diabetes Res Clin Pract* 57: 119-129
- [2] Magliano DJ, Barr EL, Zimmet PZ, et al. (2008) Glucose indices, health behaviors, and incidence of diabetes in Australia: the Australian Diabetes, Obesity and Lifestyle Study. *Diabetes Care* 31: 267-272
- [3] World Health Organization (1999) Definition, diagnosis and classification of diabetes mellitus and its complications. Part 1: diagnosis and classification of diabetes mellitus. In. Department of Noncommunicable Disease Surveillance, WHO, Geneva
- [4] Magliano D, Liew D, Pater H, et al. (2003) Accuracy of the Australian National Death Index: comparison with adjudicated fatal outcomes among Australian participants in the Long-term Intervention with Pravastatin in Ischaemic Disease (LIPID) study. *Aust N Z J Public Health* 27: 649-653
- [5] Armstrong T, Bauman AE, Davies J (2000) Physical activity patterns of Australian adults: results of the 1999 National Physical Activity Survey. Australian Institute of Health and Welfare
- [6] White IR, Royston P (2009) Imputing missing covariate values for the Cox model. *Stat Med* 28: 1982-1998
- [7] Rubin DB (2004) Multiple imputation for nonresponse in surveys. John Wiley & Sons
